# Supplementary material
Source: MDPI journal article supplement (https://www.mdpi.com/2072-4292/11/3/271)
Supplement: s1 [file s1]

## Supplementary Data

**Table S1.** Lists of forest fires newly tested as reference data provided by the Korea Forest Service and the results of the 3-step algorithm and the Collection 6 MODIS active fire data (M\*D14).

| Location                                        | Ignition date                    | Ignition time (UTC) | Extinguished data                | Extinguished time (UTC) | Cause                     | Damage d area (ha) | Detected by 3-step algorithm | Detected by MODIS |
|-------------------------------------------------|----------------------------------|---------------------|----------------------------------|-------------------------|---------------------------|--------------------|------------------------------|-------------------|
| Jangan-eup, Gijang-gun, Busan metropolitan city | January 1 <sup>st</sup> , 2018   | 12:46               | January 2 <sup>nd</sup> , 2018   | 10:00                   | Other                     | 65                 | O                            | O                 |
| Yecheon-eup, Yecheon-gun, Gyeongsangbuk-do      | January 3 <sup>rd</sup> , 2018   | 5:15                | January 3 <sup>rd</sup> , 2018   | 7:30                    | Cigarette accidental fire | 0.89               | X                            | X                 |
| Yangyang-eup, Yangyang-gun, Gangwon-do          | January 14 <sup>th</sup> , 2018  | 10:53               | January 15 <sup>th</sup> , 2018  | 20:30                   | House fire spread         | 17.73              | X                            | X                 |
| Jinbuk-myeon, Changwon-si, Gyeongsangnam-do     | January 28 <sup>th</sup> , 2018  | 4:51                | January 28 <sup>th</sup> , 2018  | 11:00                   | Other                     | 1                  | O                            | O                 |
| Jonam-dong, Siheung-si, Gyeonggi-do             | January 28 <sup>th</sup> , 2018  | 6:53                | January 28 <sup>th</sup> , 2018  | 10:00                   | Waste incineration        | 3                  | O                            | O                 |
| Punggi-eup, Yeongju-si, Gyeongsangbuk-do        | January 30 <sup>th</sup> , 2018  | 5:00                | January 30 <sup>th</sup> , 2018  | 8:30                    | Other                     | 1                  | O                            | X                 |
| Wondong-myeon, Yangsan-si, Gyeongsangnam-do     | February 6 <sup>th</sup> , 2018  | 18:37               | February 7 <sup>th</sup> , 2018  | 9:00                    | Other                     | 1.2                | O                            | X                 |
| Changsu-myeon, Yeongdeok-gun, Gyeongsangbuk-do  | February 9 <sup>th</sup> , 2018  | 22:20               | February 10 <sup>th</sup> , 2018 | 6:25                    | Other                     | 13                 | X                            | X                 |
| Hoehwa-myeon, Goseong-gun,                      | February 10 <sup>th</sup> , 2018 | 14:47               | February 11 <sup>th</sup> , 2018 | 2:00                    | Other                     | 1.5                | O                            | X                 |

|                                                       |                                        |       |                                     |       |                                                    |        |   |                                |
|-------------------------------------------------------|----------------------------------------|-------|-------------------------------------|-------|----------------------------------------------------|--------|---|--------------------------------|
| Gyeongsangnam-do                                      |                                        |       |                                     |       |                                                    |        |   |                                |
| Gogyeong-myeon,<br>Yeongcheon-si,<br>Gyeongsangbuk-do | February<br>11 <sup>th</sup> , 2018    | 5:30  | February<br>11 <sup>th</sup> , 2018 | 7:32  | Other                                              | 1      | O | X                              |
| Nogok-myeon,<br>Samcheok-si,<br>Gangwon-do            | February<br>11 <sup>th</sup> , 2018    | 7:14  | February<br>13 <sup>th</sup> , 2018 | 12:00 | House fire<br>spread                               | 161.14 | O | O<br>(The<br>following<br>day) |
| Dogye-eup,<br>Samcheok-si,<br>Gangwon-do              | February<br>11 <sup>th</sup> , 2018    | 12:27 | February<br>13 <sup>th</sup> , 2018 | 12:00 | Other                                              | 76.46  | O | O<br>(The<br>following<br>day) |
| Yongmun-myeon,<br>Yecheon-gun,<br>Gyeongsangbuk-do    | February<br>16 <sup>th</sup> , 2018    | 5:08  | February<br>16 <sup>th</sup> , 2018 | 7:30  | Ancestral<br>tomb<br>visitor<br>accidental<br>fire | 0.81   | X | X                              |
| Gwangui-myeon,<br>Gurye-gun,<br>Jeollanam-do          | February<br>16 <sup>th</sup> , 2018    | 6:55  | February<br>16 <sup>th</sup> , 2018 | 9:50  | Ancestral<br>tomb<br>visitor<br>accidental<br>fire | 3      | O | X                              |
| Hwasan-myeon,<br>Yeongcheon-si,<br>Gyeongsangbuk-do   | February<br>17 <sup>th</sup> , 2018    | 2:30  | February<br>17 <sup>th</sup> , 2018 | 6:30  | Other                                              | 1      | X | X                              |
| Changsu-myeon,<br>Yeongdeok-gun,<br>Gyeongsangbuk-do  | February<br>17 <sup>th</sup> , 2018    | 5:20  | February<br>17 <sup>th</sup> , 2018 | 14:00 | Other                                              | 7      | O | X                              |
| Gahoe-myeon,<br>Hapcheon-gun,<br>Gyeongsangnam-do     | February<br>21 <sup>th</sup> , 2018    | 7:29  | February<br>22 <sup>th</sup> , 2018 | 0:00  | Paddy<br>field<br>incineration                     | 1      | X | X                              |
| Moksadong-myeon,<br>Gokseong-gun,<br>Jeollanam-do     | February<br>26 <sup>th</sup> ,<br>2018 | 12:30 | February<br>27 <sup>th</sup> , 2018 | 18:35 | Other                                              | 0.8    | O | O                              |

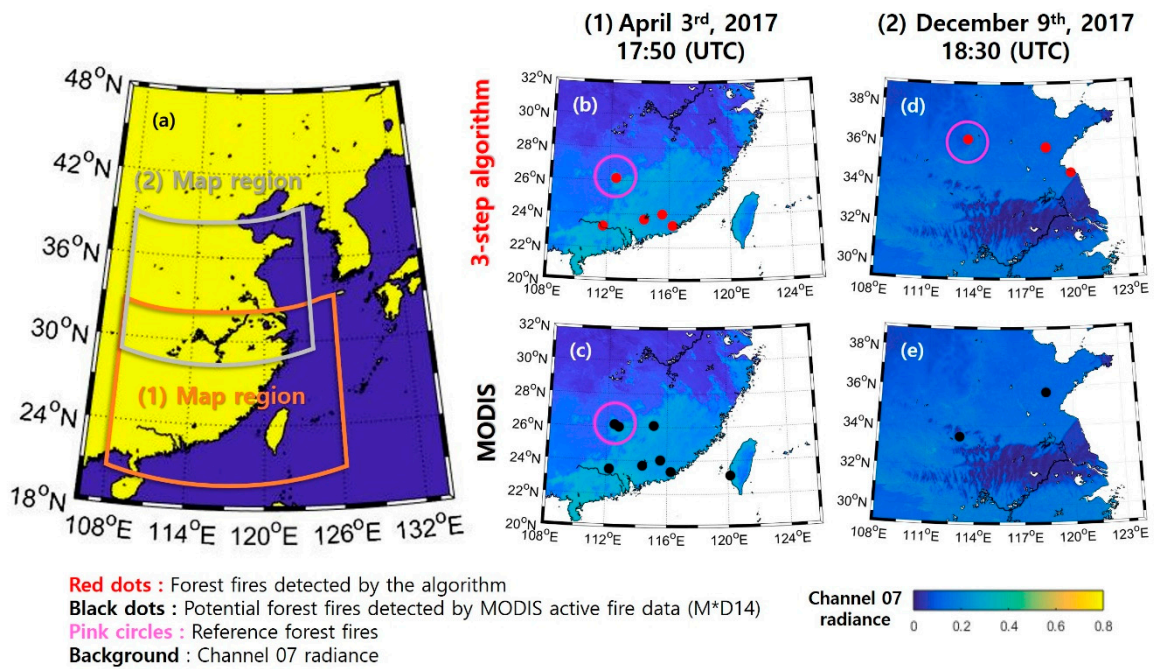

**Figure S1.** The maps of forest fires in the China detected by the 3-step algorithm in this study and the MODIS active fire data (M\*D14). 1) the forest fire (Yizhang County, Chenzhou City, Hunan Province; on April 3<sup>rd</sup>, 2017) and 2) the forest fire (Pingshun County, Changzhi City; from 15:23 on 9<sup>th</sup> to 13:00 (UTC) on 11<sup>th</sup> February 2017). The red dots are the potential forest fire pixels detected by the proposed algorithm, pink circles show actual forest fire cases from the reference data, black dots are the potential forest fire pixels detected by the Collection 6 MODIS active fire data, and the band 7 radiance of Himawari-8 AHI of each image is used as a background image.
